# Supplementary material for: Predictors of arterial stiffness in adolescents and adults with type 1 diabetes: a cross-sectional study
Source: PubMed Central journal article supplement — BMJ Open Diabetes Res Care. 2022 Jan 5;10(1):e002491. doi: 10.1136/bmjdrc-2021-002491 (PMC8734015; doi:10.1136/bmjdrc-2021-002491), 2022-01-05
Supplement: bmjdrc-2021-002491supp001.pdf [file bmjdrc-2021-002491supp001.pdf]

**Supplemental Table: Descriptive statistics of individuals treated for hypertension**

| Characteristic                                             | Mean $\pm$ SEM | 95% Confidence Interval |
|------------------------------------------------------------|----------------|-------------------------|
| Age (years)                                                | 36 $\pm$ 3.2   | 28 – 45                 |
| Diabetes duration (years)                                  | 27 $\pm$ 3.5   | 18 – 36                 |
| Presence of elevated urine albumin to creatinine ratio (n) | 1              |                         |
| Systolic blood pressure (mmHg)                             | 143 $\pm$ 6    | 127 – 158               |
| Diastolic blood pressure (mmHg)                            | 78 $\pm$ 2.2   | 72 – 83                 |
| Flow mediated dilation (%)                                 | 7 $\pm$ 0.9    | 4.7 – 9.3               |
| cfPWV (m/sec)                                              | 7.5 $\pm$ 1    | 4.9 – 10                |
| cfPWV percentile                                           | 53 $\pm$ 15    | 13 – 93                 |
| AIx (%)                                                    | 14 $\pm$ 6.5   | -2 – 31                 |

Abbreviations: ACE = Angiotensin-converting enzyme; AIx= augmentation index; cfPWV= carotid-femoral pulse wave velocity
